# Supplementary material
Source: publisher figshare collection journal article supplement (https://gsajournals.figshare.com/ndownloader/files/25651736)
Supplement: Supplementary file 1 [file 25651736]

## Sheet: Sheet1
Table S2. Plasmids used in this study.
Plasmid	Parent plasmid or Reference	Notes	How to obtain plasmid
pDD211	This paper	eft-3p::Cas9 ,U6p::sgRNA targeting par-3 5' end	Request from Dan Dickinson
pDD246	D. Dickinson, unpublished	mKate2^SEC^3xMyc vector with ccdB markers for Gibson cloning homology arms	Request from Dan Dickinson
pDD268	Dickinson et al., 2015	mNG^SEC^3xFlag vector with ccdB markers for Gibson cloning homology arms	Request from AddGene
pDD282	Dickinson et al., 2015	GFP-C1^SEC^3xFlag vector with ccdB markers for Gibson cloning homology arms	Request from AddGene
pDD283	Dickinson et al., 2015	YPET^SEC^3xFlag vector with ccdB markers for Gibson cloning homology arms	Request from AddGene
pDD284	Dickinson et al., 2015	TagRFP-T^SEC^3xFlag vector with ccdB markers for Gibson cloning homology arms	Request from AddGene
pDD285	Dickinson et al., 2015	mKate2^SEC^3xFlag vector with ccdB markers for Gibson cloning homology arms	Request from AddGene
pDD320	This paper	repair template for N-terminally taggging PAR-3 with mNG::AID*
pDD356	This paper	LoxN flanked SEC, sun-1p::TIR1::F2A::TagBFP2::AID*::NLS targeting LG I site where ttTi4348 Mos is inserted ( I:-5.32)	Request from AddGene
pDD357	This paper	LoxN flanked SEC, sun-1p::TIR1::F2A::TagBFP2::AID*::NLS targeting LG II site where ttTi5605 Mos is inserted (II:-0.77)	Request from AddGene
pDD363	Dickinson et al., 2016	LoxP-flanked SEC donor for the SapTrap cloning system	Request from AddGene
pDD364	Dickinson et al., 2016	Lox511I-flanked SEC donor for the SapTrap cloning system	Request from AddGene
pDD379	Dickinson et al., 2016	SapTrap repair template containing F+E sgRNA	Request from AddGene
pJH126	pDD356	vha-8p::TIR1::F2A::mTagBFP2::AID*::NLS LGI (-5.32)	Request from AddGene
pJH127	pDD356	myo-2p::TIR1::F2A::mTagBFP2::AID*::NLS LGI (-5.32)	Request from AddGene
pJH130	pDD356	myo-3p::TIR1::F2A::mTagBFP2::AID*::NLS LGI (-5.32)	Request from AddGene
pJM30	Hajduskova et al., 2009	SCM::nhr-25(RNAi) hairpin construct	Request from Masako Asahina
pJW1109	Ward et al., 2013	8×NR5RE(WT):pes-10Δ:NLS-3×Venus:unc-54 3′-UTR	Request from Jordan Ward
pJW1236	Ward, 2015	eft-3p::Cas9+R07E5.16 U6p::sgRNA(F+E) targeting klp-12. F+E=flipped+extended sgRNA modification described by Chen et al., 2013	Request from Jordan Ward (note pJW1219 from AddGene is a good substitute for a cloning template)
pJW1310	Ward, 2015	Template for cloning R07E5.16 U6 promoter to generate new PU6::sgRNAs by PCR-fusion	Request from AddGene
pJW1311	Ward, 2015	Template for cloning sgRNA(F+E) to generate new PU6::sgRNAs by PCR-fusion	Request from AddGene
pJW1347	pCR™-Blunt II-TOPO	30 amino acid flexible linker for CT slot for SapTrap cloning	Request from AddGene
pJW1348	pCR™-Blunt II-TOPO	30 amino acid flexible linker for NT slot for SapTrap cloning (two 30x linkers got TOPO cloned, so use 1/2 the molar amount as normal)	Request from AddGene
pJW1357	pDD356	mex-5p::TIR1::F2A::mTagBFP2::AID*::NLS LGI (-5.32)	Request from Jordan Ward
pJW1441	pDD356	eft-3p::TIR1::F2A::mTagBFP2::AID*::NLS LGI (-5.32)	Request from Jordan Ward
pJW1583	pDD282	GFP-C1^SEC^AID*::3xFlag vector with ccdB markers for Gibson cloning homology arms	Request from AddGene
pJW1584	pDD283	YPET^SEC^AID*::3xFlag vector with ccdB markers for Gibson cloning homology arms	Request from AddGene
pJW1586	pDD285	mKate2^SEC^AID*::3xFlag vector with ccdB markers for Gibson cloning homology arms	Request from AddGene
pJW1592	pDD282	GFP-C1^SEC^BioTag::AID*::3xFlag vector with ccdB markers for Gibson cloning homology arms	Request from AddGene
pJW1594	pDD284	TagRFP-T^SEC^BioTag::AID*::3xFlag vector with ccdB markers for Gibson cloning homology arms	Request from AddGene
pJW1595	pDD285	mKate2^SEC^BioTag::AID*::3xFlag vector with ccdB markers for Gibson cloning homology arms	Request from AddGene
pJW1659	pDONR221	linker::AID*::3xFLAG donor for NT slot in the SapTrap cloning system	Request from AddGene
pJW1693	pMS051 precursor (gift)	mScarlet-I (GLO) for FP slot in the SapTrap cloning system. GLO=germline optimized using algorithm from Fielmich et al., 2018	Request from Jordan Ward. pMS051 from AddGene is a functional equivalent.
pJW1726	pDD357	mex-5p::TIR1::F2A::mTagBFP2::AID*::NLS LGII (II:-0.77)	Request from Jordan Ward
pJW1748	pDD379	repair template for C-terminally tagging NHR-67 generated by SapTrap: 30 amino acid linker::GFP-C1^SEC^AID*::3xFLAG with nhr-67 homology arms; U6p::nhr-67 sgRNA (F+E)	Request from Jordan Ward
pJW1749	pDD379	repair template for C-terminally tagging LIN-42 generated by SapTrap: 30 amino acid linker::GFP-C1^SEC^AID*::3xFLAG with lin-42 homology arms; U6p::lin-42 sgRNA (F+E)	Request from Jordan Ward
pJW1759	pCR™-Blunt II-TOPO	linker::TEV::AID*::3xFLAG donor for NT slot in the SapTrap cloning system	Request from AddGene
pJW1787	pDONR221	linker::TEV::BioTag::AID*::3xFLAG donor for NT slot in the SapTrap cloning system	Request from AddGene
pJW1788	pDONR221	linker::TEV::BioTag::AID*::3xFLAG donor for CT slot in the SapTrap cloning system	Request from AddGene
pJW1805	pDONR221	linker::3xMyc for CT slot in the SapTrap cloning system	Request from AddGene
pJW1806	pDONR221	linker::3xMyc for NT slot in the SapTrap cloning system	Request from AddGene
pJW1816	pDONR221	30 amino acid flexible linker::mScarlet-I^SEC (Lox511I)^3xMyc multi-cassette donor for the SapTrap cloning system	Request from AddGene
pJW1820	pDONR221	GFP-C1^SEC (LoxP)^AID*::3xFLAG multi-cassette for SapTrap cloning	Request from AddGene
pJW1821	pDONR221	mScarlet (GLO)^SEC (Lox511I)^3xMyc cassette for SapTrap cloning	Request from AddGene
pJW1822	pDONR221	30 amino acid linker::GFP cassette for SapTrap cloning	Request from AddGene
pJW1827	pDONR221	30 amino acid linker::germline optimized mScarlet-I cassette for SapTrap cloning	Request from AddGene
pJW1836	pDONR221	promoterless SV40 NLS::mScarlet-I (dpi)::PEST::tbb-2 3'UTR vector. dpi=piRNA sites removed using pirScan (Wu et al., 2018). Sequence also codon optimized for C. elegans using the tool developed by Redemann et al., 2011	Request from AddGene
pJW1838	pMLS134	SapTrap sgRNA (F+E) vector, K09B11.2 U6 promoter and 3'UTR	Request from AddGene
pJW1839	pMLS134	SapTrap sgRNA (F+E) vector, R07E5.16 U6 promoter	Request from AddGene
pJW1841	pJW1836	promoterless SV40 NLS::mScarlet-I (dpi)::tbb-2 3'UTR vector	Request from AddGene
pJW1846	pDONR221	30 amino acid linker::GFP-C1^SEC^AID*::3xFLAG multi-cassette for SapTrap cloning	Request from AddGene
pJW1849	pJW1838	ttTi4348 site targeting sgRNA (F+E) with K09B11.2 U6 promoter and 3'UTR	Request from AddGene
pJW1850	pJW1838	ttTi5605 site targeting sgRNA (F+E) with K09B11.2 U6 promoter and 3'UTR	Request from AddGene
pJW1851	pJW1838	cxTi10882 site targeting sgRNA (F+E) with K09B11.2 U6 promoter and 3'UTR	Request from AddGene
pJW1875	pDONR221	repair template for C-terminally taggging SPE-44 generated by SapTrap:: 30 amino acid flexible linker::germline optimized mScarlet-I^SEC (Lox511I)^TEV::AID*::3XFLAG with spe-44 homology arms	Request from Jordan Ward
pJW1876	pMLS257	repair template for C-terminally taggging SPE-44 generated by SapTrap:: 30 amino acid flexible linker::germline optimized mScarlet-I^SEC (Lox511I)^3xMyc with spe-44 homology arms	Request from Jordan Ward
pJW1882	pJW1839	ttTi4348 site targeting sgRNA (F+E) with R07E5.16 U6 promoter and 3'UTR	Request from AddGene
pJW1883	pJW1839	ttTi5605 site targeting sgRNA (F+E) with R07E5.16 U6 promoter and 3'UTR	Request from AddGene
pJW1884	pJW1839	cxTi10882 site targeting sgRNA (F+E) with R07E5.16 U6 promoter and 3'UTR	Request from AddGene
pJW1886	pDONR221	30 amino acid linker::germline optimized mScarlet-I^SEC (Lox511I)^TEV-degron-3xFLAG multi-cassette for SapTrap	Request from AddGene
pJW1927	pDONR221	mScarlet (GLO)^SEC (Lox511I)^TEV::AID*::3XFLAG cassette for SapTrap cloning	Request from AddGene
pJW1940	pJW1947	SCM enhancer pes-10D minimal promoter::SV40 NLS::mScarlet-I (dpi)::tbb-2 3'UTR vector	Request from Jordan Ward
pJW1947	pJW1841	pes-10D minimal promoter::SV40 NLS::mScarlet-I (dpi)::tbb-2 3'UTR vector	Request from AddGene
pJW1948	pJW1836	pes-10D minimal promoter::SV40 NLS::mScarlet-I (dpi)::PEST::tbb-2 3'UTR vector	Request from AddGene
pJW2024	pDD357	SCM min pes-10D minimal promoter:::TIR1::F2A::mTagBFP2::AID*::NLS LGII (II:-0.77)	Request from Jordan Ward
pJW2025	pDD357	dpy-7p::TIR1::F2A::mTagBFP2::AID*::NLS LGII (II:-0.77)	Request from Jordan Ward
pJW2026	pDD356	SCM min pes-10D minimal promoter::TIR1::F2A::mTagBFP2::AID*::NLS LGI (-5.32)	Request from Jordan Ward
pJW2027	pDD356	dpy-7p::TIR1::F2A::mTagBFP2::AID*::NLS LGI (-5.32)	Request from Jordan Ward
pJW2072	pDONR221	30 amino acid linker::mScarlet-I (dpi)::3xMyc::10 amino acid linker	Request from AddGene
pJW2086	pDONR221	30 amino acid linker::GFP-C1::AID*::3xFLAG::10 amino acid linker	Request from AddGene
pJW2088	pDONR221	30 amino acid linker::GFP-C1::3xFLAG::10 amino acid linker	Request from AddGene
pJW2098	pJW2071	30 amino acid linker::mScarlet (dpi)::AID*::3xFLAG::10 amino acid linker	Request from AddGene
pJW2171	pJW2086	30 amino acid linker::mNeonGreen (dpi)::AID*::3xFLAG::10 amino acid linker	Request from AddGene
pJW2172	pJW2086	30 amino acid linker::mNeonGreen (dpi)::3xFLAG::10 amino acid linker	Request from AddGene
pMLS134	Schwartz et al., 2016	SapTrap destination vector for building sgRNA expression vectors.	Request from AddGene
pMLS257	Schwartz et al., 2016	SapTrap destination vector for building repair template only vectors; no sgRNA	Request from AddGene
pMS051	Dickinson et al., 2018; Fielmich et al. 2018	mScarlet-I (GLO) for FP slot in the SapTrap cloning system	Request from AddGene
pTD73	pDD356	ges-1p::TIR1::F2A::mTagBFP2::AID*::NLS LGI (-5.32)	Request from AddGene
pTD74	pDD356	unc-54p::TIR1::F2A::mTagBFP2::AID*::NLS LGI (-5.32)	Request from AddGene
pTD75	pDD356	col-10p::TIR1::F2A::mTagBFP2::AID*::NLS LGI (-5.32)	Request from AddGene
pTD77	pJW1236	eft-3p::Cas9 , R07E5.16 U6::sgRNA targeting LGI site where ttTi4348 Mos is inserted	Request from AddGene
pTD78	pJW1236	eft-3p::Cas9 , R07E5.16 U6::sgRNA targeting LGII site where ttTi5605 Mos is inserted	Request from AddGene
pTD79	pDD356	rgef-1p::TIR1::F2A::mTagBFP2::AID*::NLS LGI (-5.32)	Request from AddGene
pTD80	pDD357	ges-1p:TIR1::F2A::mTagBFP2::AID*::NLS LGII (II:-0.77)	Request from AddGene
pTD81	pDD357	col-10p::TIR1::F2A::mTagBFP2::AID*::NLS LGII (II:-0.77)	Request from AddGene
pTD82	pDD357	unc-54p::TIR1::F2A::mTagBFP2::AID*::NLS LGII (II:-0.77)	Request from AddGene
pTNM063	pDD286/pDD312	TagRFP-T^SEC^::3xFlag::AID* vector with ccdB markers for Gibson cloning homology arms	Request from AddGene
pWZ126	Matus et al., 2015	cdh-3p template	Request from David Matus
pWZ184	pDD357	cdh-3p::TIR1::F2A::mTagBFP2::AID*::NLS LGII (II:-0.77)	Request from David Matus

## Sheet: Sheet2
	sgRNA target
Vector backbone	ttTi4348	ttTi5605	cxTi10882
pJW1838	pJW1849	pJW1850	pJW1851
pJW1839	pJW1882	pJW1883	pJW1884
